# Supplementary material for: Antisense transcription as a tool to tune gene expression
Source: PubMed Central journal article supplement (PMC4731013; doi:10.15252/msb.20156540), 2016-01-13
Supplement: MSB-12-854-s001.pdf [file MSB-12-854-s001.pdf]

## **Appendix for**

# **Antisense transcription as a tool to tune gene expression**

Jennifer A.N. Brophy and Christopher A. Voigt

## **Contents**

### **Appendix figures and tables**

|                      |                                                                                        |
|----------------------|----------------------------------------------------------------------------------------|
| Appendix Figure S1:  | Reverse transcription reporter plasmids.                                               |
| Appendix Figure S2:  | Growth curves of cells harboring antisense reporter plasmids.                          |
| Appendix Figure S3:  | Correlations between bin fluorescence and part strengths.                              |
| Appendix Figure S4:  | Sorted gates vs. terminator strength.                                                  |
| Appendix Figure S5:  | Plasmids to measure repression generated by asRNA produced in <i>trans</i> .           |
| Appendix Figure S6:  | Model results when $\epsilon_F$ and $\epsilon_R = 0 - 1$ at increments of 0.01.        |
| Appendix Figure S7:  | Best fit values of $\epsilon$ as a function of $P_F$ and $P_R$ promoter strength.      |
| Appendix Figure S8:  | Reverse transcription reporter plasmids to vary the distance between promoters $N$ .   |
| Appendix Figure S9:  | NOT gate plasmids used in this study.                                                  |
| Appendix Figure S10: | Plasmids to measure promoter firing rates (RNAP/second)                                |
| Appendix Figure S11: | REU standard plasmids used in this study.                                              |
| Appendix Figure S12: | Fluorescence histograms corresponding to the data in Figure 1c.                        |
| Appendix Figure S13: | Fold-repression $\theta$ generated by additional antisense promoters in <i>trans</i> . |
| Appendix Table S1:   | Illumina sequencing results.                                                           |
| Appendix Table S2:   | Terminator/promoter pairs tested.                                                      |
| Appendix Table S3:   | Collision interference model parameters.                                               |
| Appendix Table S4:   | Oligonucleotides used in this study.                                                   |
| Appendix Table S5:   | Promoter and Terminator ordering for Figure EV4                                        |

## Appendix Figures:

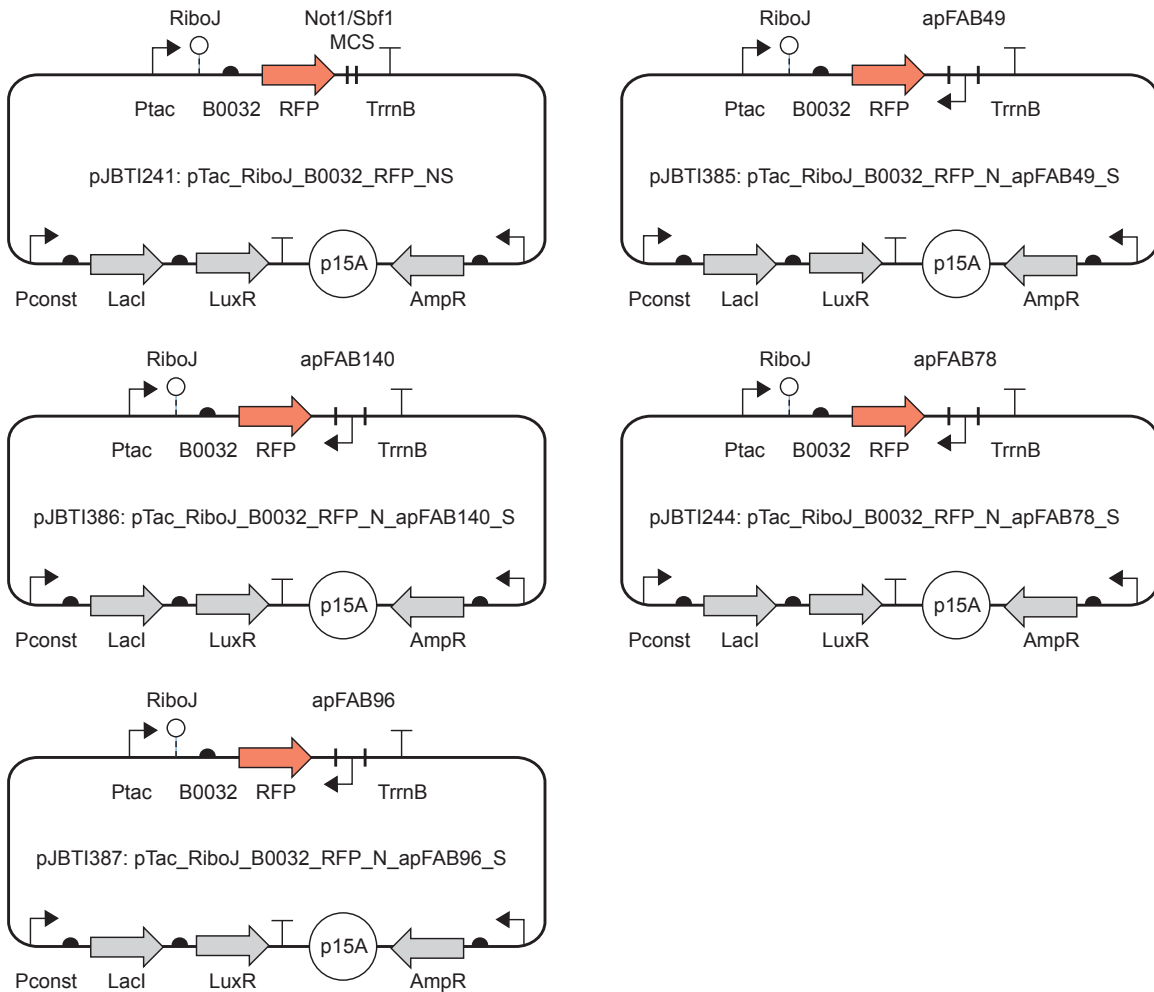

**Appendix Figure S1: Reverse transcription reporter plasmids.** pJBTI241 was used to measure  $P_{tac}$  driven expression of RFP. Not1/Sbf1 multiple cloning sites were used to digest pJBTI241 and insert promoters (apFAB49, apFAB140, apFAB78, apFAB96) at the 3' end of *rfp*, yielding plasmids pJBTI385, pJBTI386, pJBTI244, and pJBTI387. These plasmids were used to measure RFP expression with and without antisense promoters and quantify antisense transcription-mediated repression.

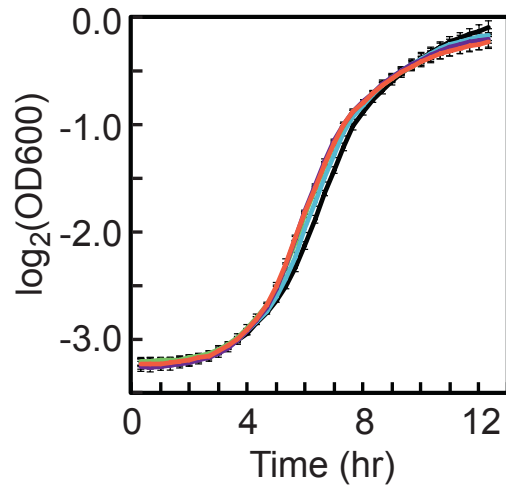

**Appendix Figure S2:** Growth curves of cells harboring antisense reporter plasmids. Constitutive antisense promoters do not cause growth defects. No antisense promoter (JBTI241; black), apFAB49 (JBTI385; blue), apFAB140 (JBTI386; green), apFAB78 (JBTI244; purple), apFAB96 (JBTI387; red). Error bars are the s.d. of three biological replicates.

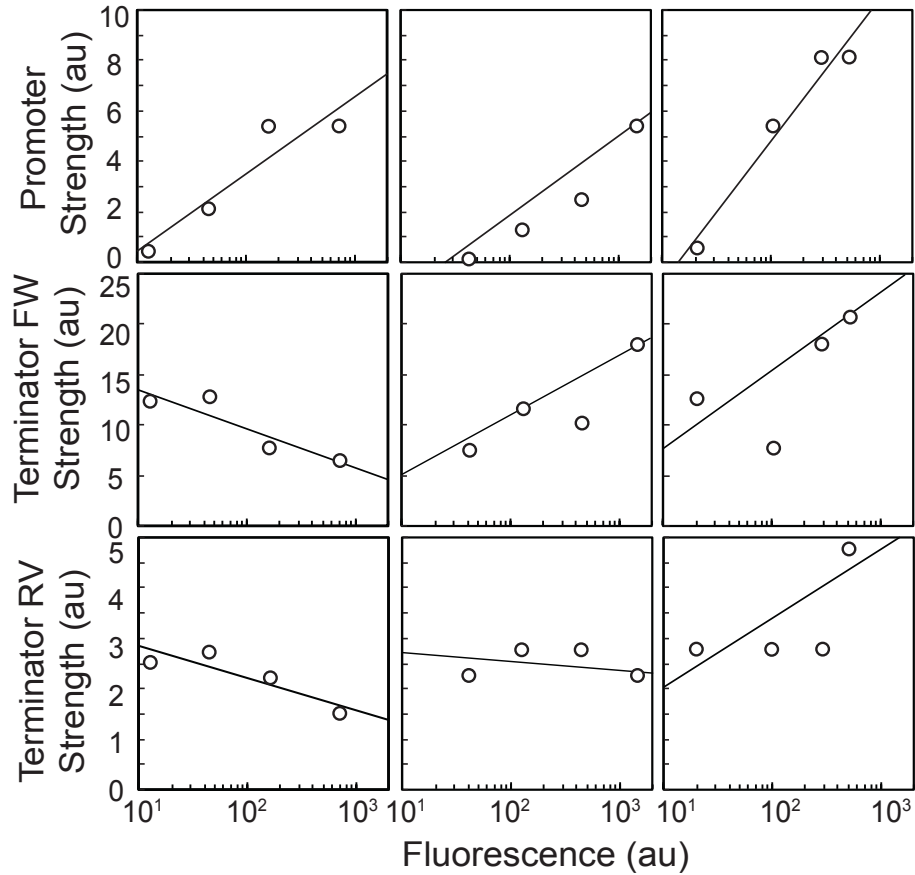

**Appendix Figure S3: Correlations between bin fluorescence and part strengths.** Median strengths of all composite parts sorted into bins in the PhIF (Left), SrpR (Center) and TarA (Right) libraries as a function of median bin fluorescence. Antisense promoter strengths correlate positively with bin fluorescence; PhIF  $R^2 = 0.87421$ , SrpR  $R^2 = 0.96061$ , TarA  $R^2 = 0.96112$  (logarithmic regression). Forward and reverse terminator strengths do not show consistent trends across the libraries; PhIF FW  $R^2 = 0.84079$ , PhIF RV  $R^2 = 0.78599$ , SrpR FW  $R^2 = 0.8628$ , SrpR RV  $R^2 = 0.16902$ , TarA FW  $R^2 = 0.71405$ , TarA RV  $R^2 = 0.74852$  (logarithmic regression).

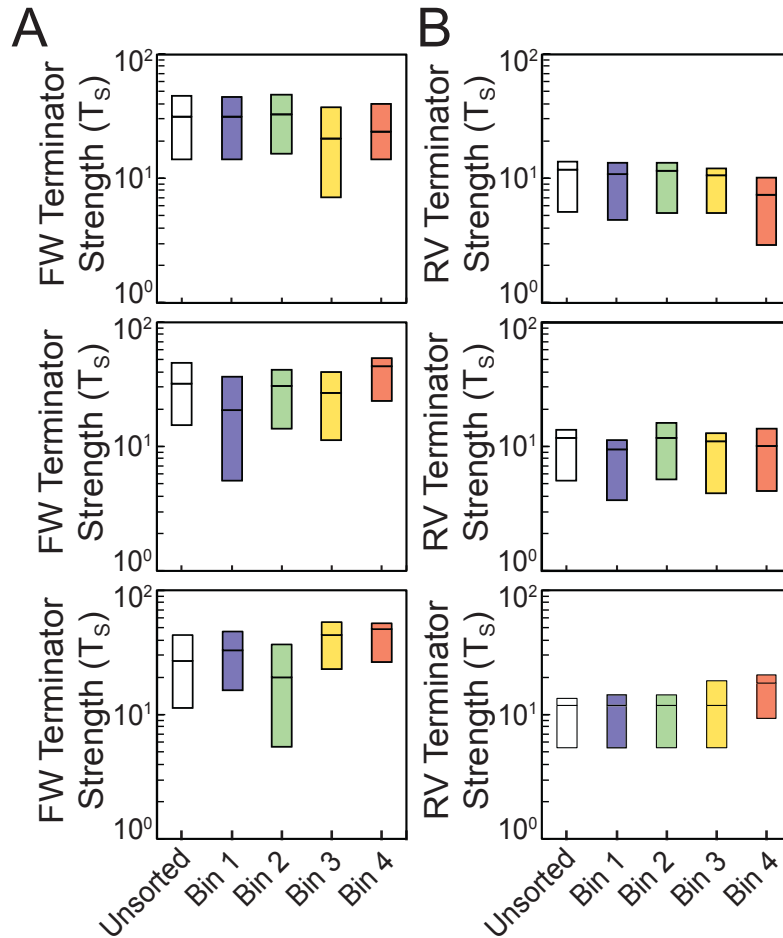

**Appendix Figure S4: Sorted gates vs. terminator strength.** (a) Forward and (b) reverse terminator strengths in the unsorted (white) and sorted (Bins 1p 4) libraries. PhIF (top), SrpR (middle), TarA (bottom). All terminator strengths were measured in a previous study (Chen et al, 2013). Box plots display the median part strength, with hinges indicating the first and third quartiles.

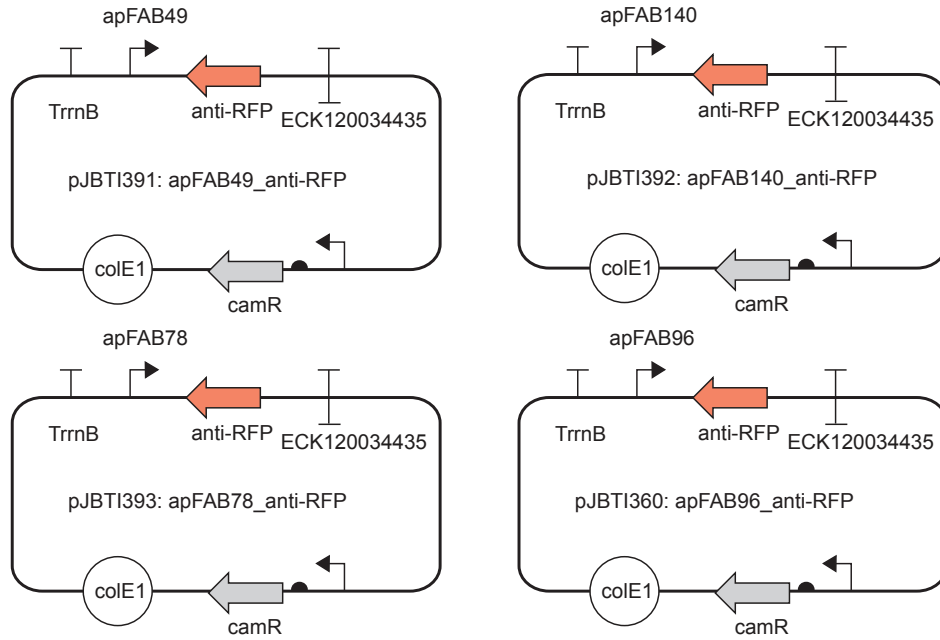

**Appendix Figure S5:** Plasmids to measure repression generated by asRNA produced in *trans*. These plasmids were co-transformed with pJBTI241 and RFP fluorescence was measured to test repression generated by asRNA in *trans*.

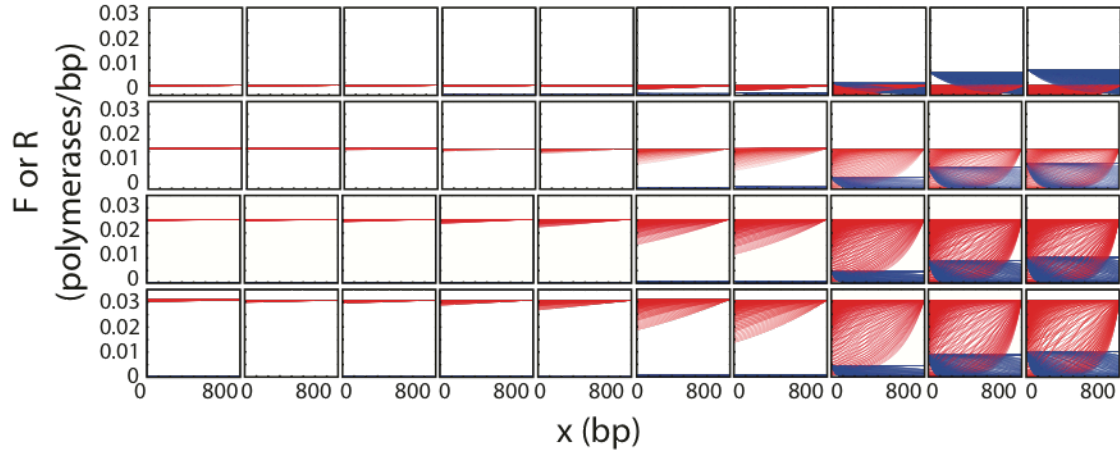

**Appendix Figure S6:** Model results when  $\varepsilon_F$  and  $\varepsilon_R = 0 - 1$  at increments of 0.01. Graphs show density of polymerases fired from either the forward (F - blue) or interfering promoter (R - red) along the DNA. Forty different forward/interfering promoter combinations were simulated, which model  $P_F$  as pTac + ten IPTG concentrations (1, 5, 10, 20, 50, 70, 100, 200, 500, 1000  $\mu\text{M}$ ; across) and  $P_R$  as apFAB49 (top row), apFAB140 (second row), apFAB78 (third row), or apFAB96 (bottom row).

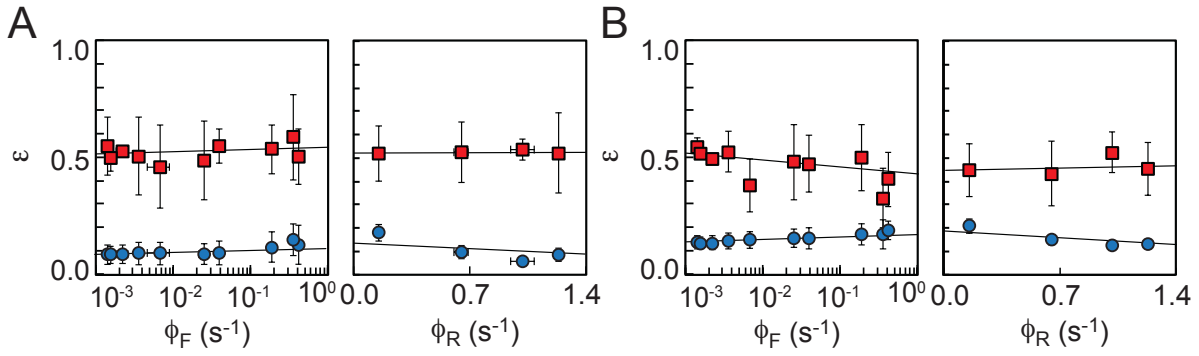

**Appendix Figure S7: Best fit values of  $\varepsilon$  as a function of forward  $P_F$  and antisense  $P_R$  promoter strength.** Relationships between forward promoter strengths,  $\phi_F$  and  $\phi_R$ , and the probabilities that polymerases fall off the DNA after collision,  $\varepsilon_F$  (blue circles) and  $\varepsilon_R$  (red squares). Graphs show the best  $\varepsilon_F$  and  $\varepsilon_R$  for each promoter combination from the  $\varepsilon$  parameter sweep and experimentally measured  $\phi_F$  and  $\phi_R$ .  $\varepsilon_F$  and  $\varepsilon_R$  were fit to experimental data of fold repression generated by transcriptional interference alone  $\theta_{TI}$  (a) or by maximum fold repression (b). The highest scoring  $\varepsilon_F$ s and  $\varepsilon_R$ s for each  $\phi_F$  and  $\phi_R$  are averaged, y-error bars show the s.d. between these values. x-error bars show the s.d. of three replicates collected on different days.



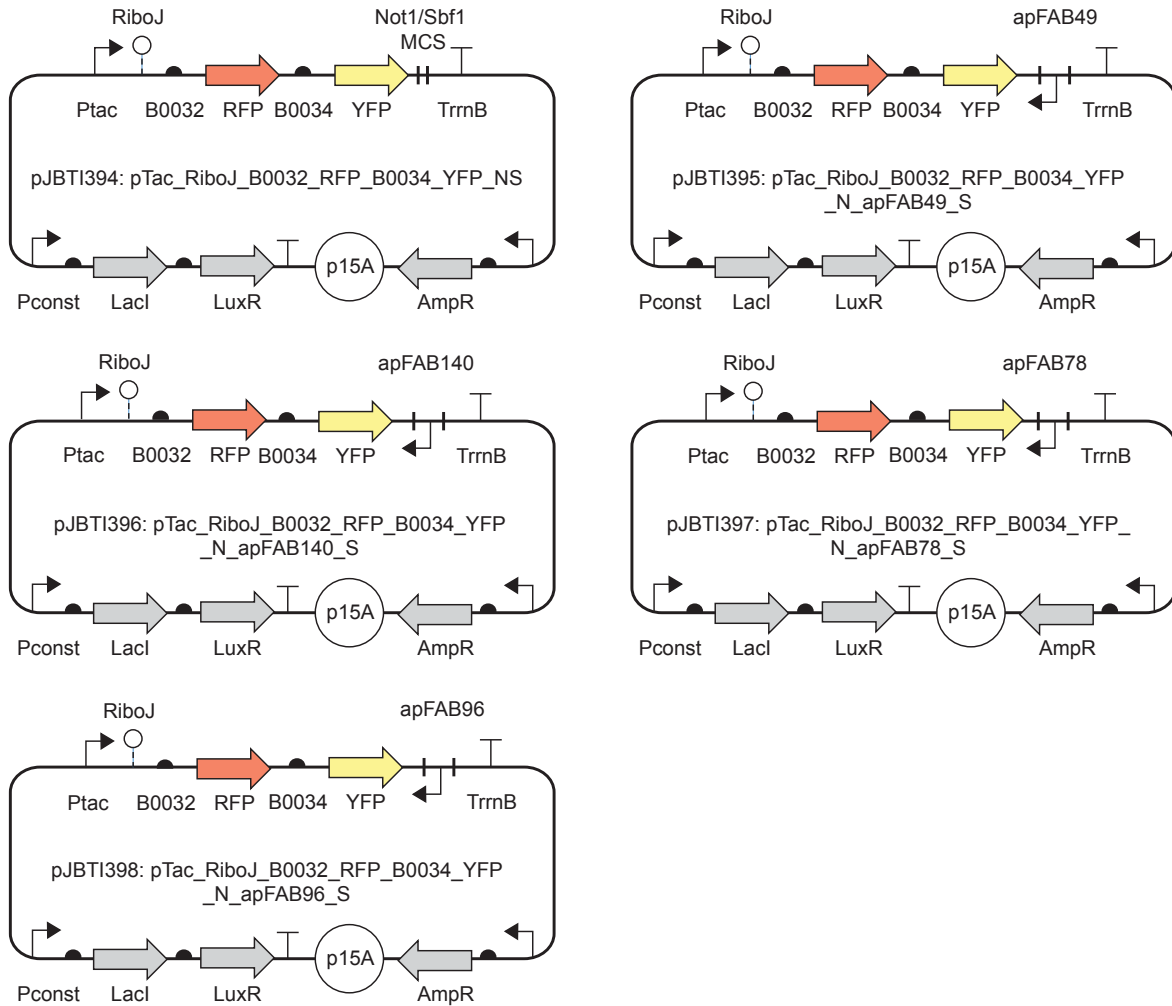

**Appendix Figure S8: Reverse transcription reporter plasmids to vary the distance between promoters *N*.** pJBTI394 was used to measure  $P_{tac}$  driven expression of RFP and YFP. Not1/Sbf1 multiple cloning sites were used to digest pJBTI394 and insert promoters (apFAB49, apFAB140, apFAB78, apFAB96) at the 3' end of *yfp*, yielding plasmids pJBTI395, pJBTI396, pJBTI397, and pJBTI398. These plasmids were used to measure RFP and YFP expression with and without antisense promoters and quantify antisense transcription-mediated repression.

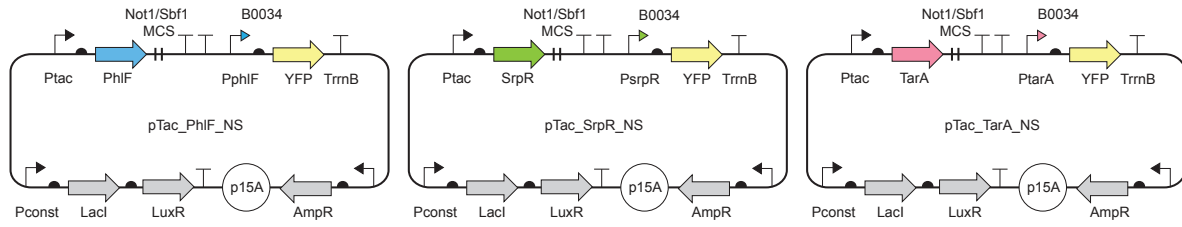

**Appendix Figure S9: NOT gate plasmids used in this study.** All NOT gate plasmids have Not1/Sbf1 multiple cloning sites used to insert terminator/antisense promoter oligonucleotide library.

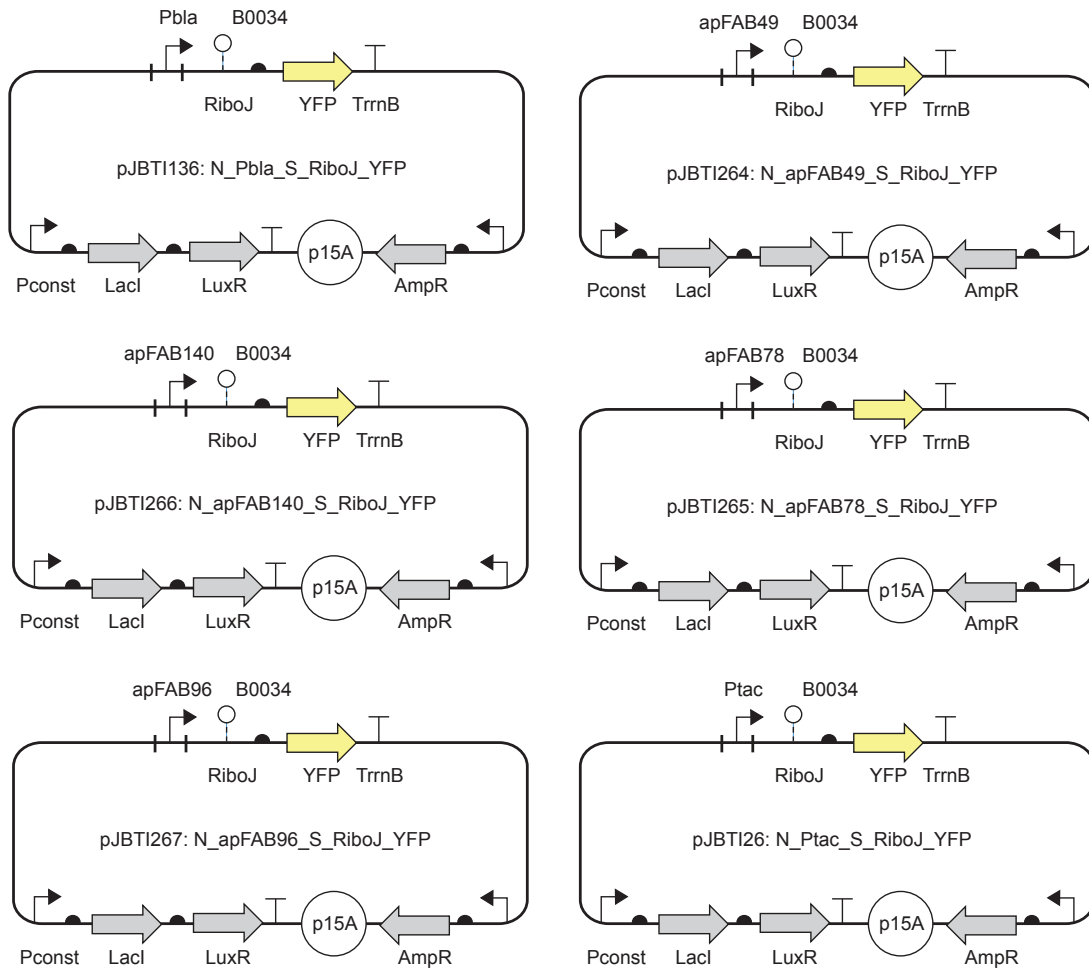

**Appendix Figure S10: Plasmids to measure promoter firing rates (RNAP/second)** Promoter Pbla was used to define a polymerase firing rate of  $0.031 \text{ s}^{-1}$ . Not1/Sbf1 multiple cloning sites were used to digest the reference plasmid and insert other promoters (apFAB49, apFAB140, apFAB78, apFAB96, Ptac) for promoter strength measurement.

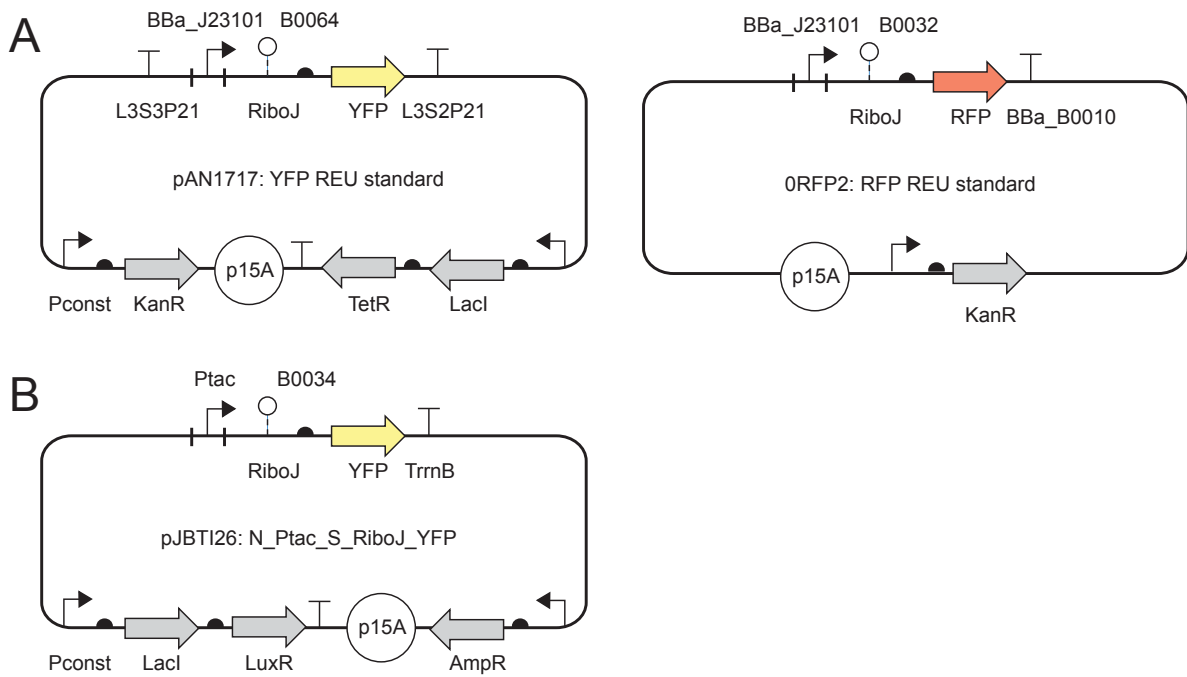

**Appendix Figure S11: REU standard plasmids used in this study. (A)** Plasmids used to convert YFP (pAN1717) and RFP (0RFP2) fluorescence measurements into Relative Expression Units (REUs) (Supplementary Methods). **(B)** Plasmid used to measure input ( $P_{tac}$ ) promoter activity for NOT gate response functions.

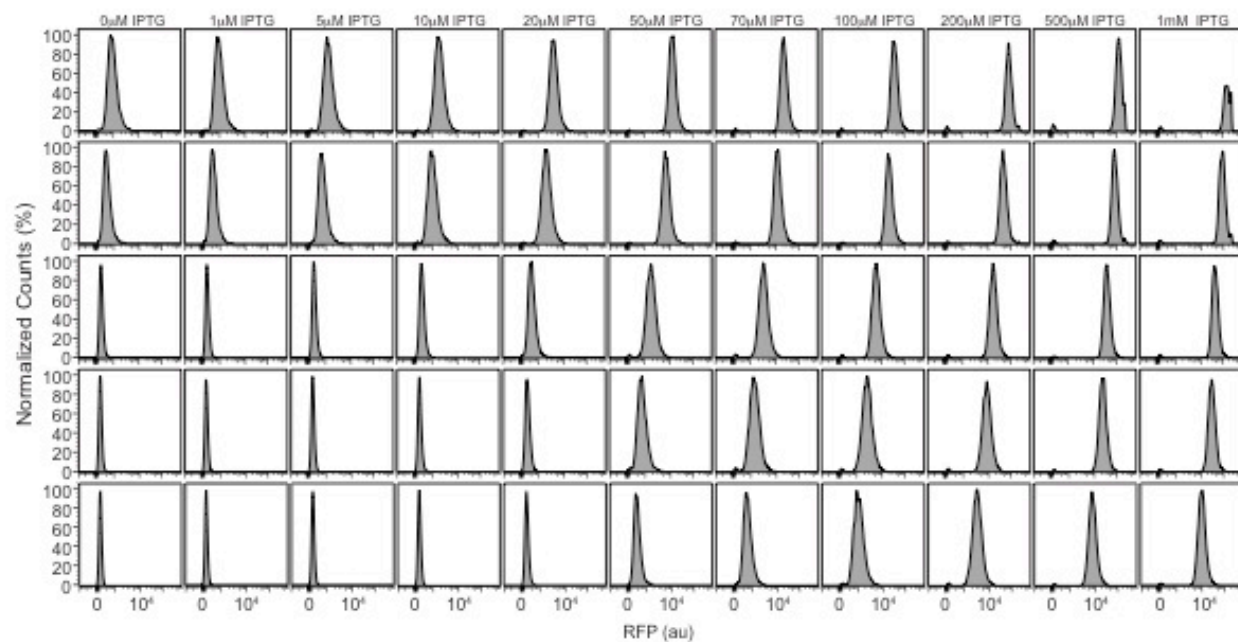

**Appendix Figure S12:** Fluorescence histograms corresponding to the data in Figure 1c. Antisense promoter: none (JBTI241 - top row), apFAB49 (JBTI385 - second row), apFAB140 (JBTI386 - third row), apFAB78 (JBTI244 - fourth row), apFAB96 (JBTI387 - bottom row).

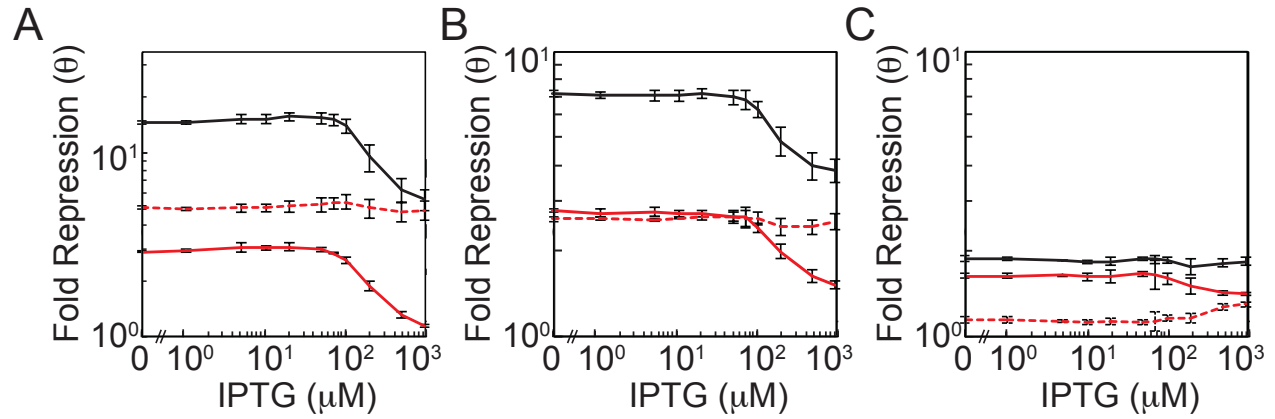

**Appendix Figure S13: Fold-repression  $\theta$  generated by additional antisense promoters in *trans*.** Total fold repression generated by antisense promoters (a - apFAB78, b - apFAB140, c - apFAB49) is shown as a function of forward promoter activity using the characterization system in Figure 1A (black line). This is compared to the repression observed when the same promoters are used to drive the transcription of asRNA in *trans* from a separate plasmid (dashed red line) (Figure EV4). The repression due to transcriptional interference  $\theta_{\text{TI}}$  (solid red line) is inferred from the total and *trans* asRNA repression data.

**Appendix Tables:**

|                 | Total     | Unpaired |        | Paired    |        | Not1/Sbf1 (-) |       | Not1/Sbf1 (+) |        | Perfect |        |
|-----------------|-----------|----------|--------|-----------|--------|---------------|-------|---------------|--------|---------|--------|
|                 |           | Reads    | %      | Reads     | %      | Reads         | %     | Reads         | %      | Reads   | %      |
| <b>PhIF</b>     |           |          |        |           |        |               |       |               |        |         |        |
| <b>Unsorted</b> | 2,187,634 | 258,535  | 11.82% | 1,929,099 | 88.18% | 79,033        | 4.10% | 1,850,066     | 84.57% | 607,711 | 32.85% |
| <b>BIN1</b>     | 2,004,210 | 239,025  | 11.93% | 1,765,185 | 88.07% | 72,371        | 4.10% | 1,692,814     | 84.46% | 548,928 | 32.43% |
| <b>BIN2</b>     | 167,601   | 12,946   | 7.72%  | 154,655   | 92.28% | 5,204         | 3.36% | 149,451       | 89.17% | 46,927  | 31.40% |
| <b>BIN3</b>     | 125,143   | 13,686   | 10.94% | 111,457   | 89.06% | 4,628         | 4.15% | 106,829       | 85.37% | 34,268  | 32.08% |
| <b>BIN4</b>     | 106,160   | 10,798   | 10.17% | 95,362    | 89.83% | 3,369         | 3.53% | 91,993        | 86.66% | 35,642  | 38.74% |
| <b>SrpR</b>     |           |          |        |           |        |               |       |               |        |         |        |
| <b>Unsorted</b> | 1,663,731 | 198,112  | 11.91% | 1,465,619 | 88.09% | 75,217        | 5.13% | 1,390,402     | 83.57% | 431,538 | 31.04% |
| <b>BIN1</b>     | 1,872,389 | 225,333  | 12.03% | 1,647,056 | 87.97% | 63,961        | 3.88% | 1,583,095     | 84.55% | 497,718 | 31.44% |
| <b>BIN2</b>     | 122,744   | 12,629   | 10.29% | 110,115   | 89.71% | 5,097         | 4.63% | 105,018       | 85.56% | 39,937  | 38.03% |
| <b>BIN3</b>     | 153,442   | 13,987   | 9.12%  | 139,455   | 90.88% | 4,774         | 3.42% | 134,681       | 87.77% | 37,026  | 27.49% |
| <b>BIN4</b>     | 163,519   | 12,563   | 7.68%  | 150,956   | 92.32% | 4,770         | 3.16% | 146,186       | 89.40% | 49,411  | 33.80% |
| <b>TarA</b>     |           |          |        |           |        |               |       |               |        |         |        |
| <b>Unsorted</b> | 2,171,123 | 198,140  | 9.13%  | 1,972,983 | 90.87% | 76,631        | 3.88% | 1,896,352     | 87.34% | 622,713 | 32.84% |
| <b>BIN1</b>     | 1,910,985 | 184,335  | 9.65%  | 1,726,650 | 90.35% | 77,528        | 4.49% | 1,649,122     | 86.30% | 517,513 | 31.38% |
| <b>BIN2</b>     | 180,667   | 18,879   | 10.45% | 161,788   | 89.55% | 6,060         | 3.75% | 155,728       | 86.20% | 57,696  | 37.05% |
| <b>BIN3</b>     | 157,354   | 23,898   | 15.19% | 133,456   | 84.81% | 6,502         | 4.87% | 126,954       | 80.68% | 51,839  | 40.83% |
| <b>BIN4</b>     | 143,926   | 17,630   | 12.25% | 126,296   | 87.75% | 4,831         | 3.83% | 121,465       | 84.39% | 47,742  | 39.31% |

**Appendix Table S1: Illumina sequencing results.**

| <b>Terminator</b> | <b>Promoter</b> | <b>Maximum repression <math>\pm</math> s.d.</b> |
|-------------------|-----------------|-------------------------------------------------|
| ECK120035132      | apFAB71         | 61.86 $\pm$ 33.25                               |
| ECK120010831      | apFAB71         | 36.60 $\pm$ 12.32                               |
| ECK120021270      | apFAB67         | 23.08 $\pm$ 1.50                                |
| ECK120021270      | apFAB61         | 17.94 $\pm$ 2.29                                |
| ECK120010793      | apFAB61         | 12.84 $\pm$ 1.54                                |
| ECK120034435      | apFAB341        | 7.05 $\pm$ 0.63                                 |
| ECK120030221      | Bba_J23119      | 7.16 $\pm$ 0.75                                 |
| ECK120010815      | apFAB345        | 1.49 $\pm$ 0.02                                 |
| ECK120010831      | apFAB345        | 1.51 $\pm$ 0.18                                 |
| ECK120035132      | Bba_J23102      | 1.44 $\pm$ 0.06                                 |
| ECK120010793      | apFAB69         | 1.26 $\pm$ 0.03                                 |
| ECK120034435      | apFAB259        | 1.23 $\pm$ 0.17                                 |
| ECK120030221      | apFAB259        | 0.98 $\pm$ 0.04                                 |
| ECK120010836-R    | Bba_J23109      | 0.87 $\pm$ 0.03                                 |

**Appendix Table S2:** Terminator/promoter pairs tested in Figure 3c. Maximum repression is the average of three replicates collected on different days.



| Parameter    | Meaning                                               | Values                                                                                                                                                                                                                                           | References                                                                                                                                                   |
|--------------|-------------------------------------------------------|--------------------------------------------------------------------------------------------------------------------------------------------------------------------------------------------------------------------------------------------------|--------------------------------------------------------------------------------------------------------------------------------------------------------------|
| N            | Distance between transcription start points (bp)      | 841                                                                                                                                                                                                                                              |                                                                                                                                                              |
| v            | Speed of transcription (bp/s)                         | 40                                                                                                                                                                                                                                               | 37, 72                                                                                                                                                       |
| $\phi_F$     | Rate of RNAP production from $P_F$ (s <sup>-1</sup> ) | pBla: 0.031<br>pTac [1]: 0.001439<br>pTac [5]: 0.001548<br>pTac [10]: 0.002232<br>pTac [20]: 0.003643<br>pTac [50]: 0.006778<br>pTac [70]: 0.025262<br>pTac [100]: 0.03976<br>pTac [200]: 0.18756<br>pTac [500]: 0.35764<br>pTac [1000]: 0.41141 | 62<br>this study<br>this study |
| $\phi_R$     | Rate of RNAP production from $P_R$ (s <sup>-1</sup> ) | apFAB49: 0.15345<br>apFAB140: 0.64814<br>apFAB78: 1.01410<br>apFAB96: 1.23185                                                                                                                                                                    | this study<br>this study<br>this study<br>this study                                                                                                         |
| $\epsilon_F$ | Ejection factor for RNAP fired from $P_F$             | 0.104 ± 0.031                                                                                                                                                                                                                                    | fitted                                                                                                                                                       |
| $\epsilon_R$ | Ejection factor for RNAP fired from $P_R$             | 0.494 ± 0.027                                                                                                                                                                                                                                    | fitted                                                                                                                                                       |

**Appendix Table S3: Model parameters**

| <b>Amplify oligonucleotides from chip synthesized pool:</b> |                                       |                                                                   |
|-------------------------------------------------------------|---------------------------------------|-------------------------------------------------------------------|
| oj1299                                                      | FW                                    | ATATAGATGCCGTCCCTAGCGGCG                                          |
| oj1300                                                      | RV                                    | TGGGCACAGGAAAGATACTTCCTG                                          |
| <b>Add deep sequencing barcodes:</b>                        |                                       |                                                                   |
| oj1302                                                      | FW amplification primer:              | AATGATACGGCGACCACCGAGATCTACACgtgacatTAACTAGG<br>GCGCGCCGC         |
| oj1334                                                      | RV PhIF BIN1 amplification primer     | CAAGCAGAAGACGGCATAACGAGATGTGTGTgcttctcgccaTGG<br>GGGTATGGCCTGCAGG |
| oj1335                                                      | RV PhIF BIN2 amplification primer     | CAAGCAGAAGACGGCATAACGAGATAGGTGTgcttctcgccaTGG<br>GGGTATGGCCTGCAGG |
| oj1336                                                      | RV PhIF BIN3 amplification primer     | CAAGCAGAAGACGGCATAACGAGATTCGTGTgcttctcgccaTGGG<br>GGTATGGCCTGCAGG |
| oj1337                                                      | RV PhIF BIN4 amplification primer     | CAAGCAGAAGACGGCATAACGAGATCAGTGTgcttctcgccaTGG<br>GGGTATGGCCTGCAGG |
| oj1338                                                      | RV PhIF Unsorted amplification primer | CAAGCAGAAGACGGCATAACGAGATGTAGGTgcttctcgccaTGG<br>GGGTATGGCCTGCAGG |
| oj1339                                                      | RV SrpR BIN1 amplification primer     | CAAGCAGAAGACGGCATAACGAGATGTGTTcgttctcgccaTGGG<br>GGTATGGCCTGCAGG  |
| oj1340                                                      | RV SrpR BIN2 amplification primer     | CAAGCAGAAGACGGCATAACGAGATCATGACgcttctcgccaTGG<br>GGGTATGGCCTGCAGG |
| oj1341                                                      | RV SrpR BIN3 amplification primer     | CAAGCAGAAGACGGCATAACGAGATGTTCTCgcttctcgccaTGGG<br>GGTATGGCCTGCAGG |
| oj1342                                                      | RV SrpR BIN4 amplification primer     | CAAGCAGAAGACGGCATAACGAGATAGTCTCgcttctcgccaTGGG<br>GGTATGGCCTGCAGG |
| oj1343                                                      | RV SrpR Unsorted amplification primer | CAAGCAGAAGACGGCATAACGAGATTCTCTCgcttctcgccaTGGG<br>GGTATGGCCTGCAGG |
| oj1344                                                      | RV TarA BIN1 amplification primer     | CAAGCAGAAGACGGCATAACGAGATTGCAGAgcttctcgccaTGG<br>GGGTATGGCCTGCAGG |
| oj1345                                                      | RV TarA BIN2 amplification primer     | CAAGCAGAAGACGGCATAACGAGATGTATCAgcttctcgccaTGGG<br>GGTATGGCCTGCAGG |
| oj1346                                                      | RV TarA BIN3 amplification primer     | CAAGCAGAAGACGGCATAACGAGATTCTCCAgttctcgccaTGGG<br>GGTATGGCCTGCAGG  |
| oj1347                                                      | RV TarA BIN4 amplification primer     | CAAGCAGAAGACGGCATAACGAGATCATCCAgttctcgccaTGGG<br>GGTATGGCCTGCAGG  |
| oj1348                                                      | RV TarA Unsorted amplification primer | CAAGCAGAAGACGGCATAACGAGATGTACAgcttctcgccaTGG<br>GGGTATGGCCTGCAGG  |
| <b>Sequencing primers:</b>                                  |                                       |                                                                   |
| oj1301                                                      | FW seq primer:                        | gtgacatTAACTAGGGCGCGCCGC                                          |
| oj1303                                                      | RV seq primer:                        | gcttctcgccaTGGGGGTATGGCCTGCAGG                                    |
| oj1356                                                      | Barcode read:                         | CCTGCAGGCCATACCCCAtggcgagaagc                                     |

**Appendix Table S4: Oligonucleotides used in this study**

| Terminators |                | Promoters |          |        |          |
|-------------|----------------|-----------|----------|--------|----------|
| Number      | Name           | Number    | Name     | Number | Name     |
| 1           | ECK120010843-R | 1         | apFAB46  | 56     | apFAB33  |
| 2           | ECK120010802   | 2         | apFAB101 | 57     | apFAB339 |
| 3           | ECK120010813-R | 3         | apFAB96  | 58     | apFAB321 |
| 4           | ECK120010780   | 4         | apFAB47  | 59     | apFAB115 |
| 5           | ECK120029530-R | 5         | apFAB42  | 60     | apFAB125 |
| 6           | ECK120015446-R | 6         | apFAB95  | 61     | apFAB82  |
| 7           | BBa_B0051      | 7         | apFAB36  | 62     | j23102   |
| 8           | ECK120030672   | 8         | apFAB68  | 63     | apFAB346 |
| 9           | ECK120035132   | 9         | apFAB31  | 64     | apFAB317 |
| 10          | ECK120015439-R | 10        | apFAB93  | 65     | apFAB63  |
| 11          | ECK120026315-R | 11        | apFAB54  | 66     | apFAB64  |
| 12          | ECK120010831   | 12        | apFAB92  | 67     | apFAB322 |
| 13          | ECK120010841-R | 13        | apFAB52  | 68     | apFAB150 |
| 14          | ECK120020528   | 14        | apFAB81  | 69     | apFAB69  |
| 15          | ECK120010796   | 15        | apFAB71  | 70     | j23101   |
| 16          | ECK120010874   | 16        | apFAB67  | 71     | apFAB104 |
| 17          | ECK120020622   | 17        | apFAB70  | 72     | apFAB89  |
| 18          | ECK120010857   | 18        | apFAB79  | 73     | apFAB306 |
| 19          | ECK120030802   | 19        | apFAB100 | 74     | apFAB338 |
| 20          | ECK120021270   | 20        | apFAB45  | 75     | apFAB58  |
| 21          | ECK120011170-R | 21        | apFAB61  | 76     | apFAB302 |
| 22          | ECK120010852   | 22        | apFAB341 | 77     | apFAB73  |
| 23          | ECK120020525   | 23        | apFAB80  | 78     | j23118   |
| 24          | ECK120010832-R | 24        | apFAB29  | 79     | apFAB342 |
| 25          | ECK120010833   | 25        | apFAB32  | 80     | apFAB87  |
| 26          | ECK120010812-R | 26        | apFAB40  | 81     | j23106   |
| 27          | ECK120010836-R | 27        | apFAB30  | 82     | apFAB49  |
| 28          | ECK120010871   | 28        | apFAB56  | 83     | apFAB38  |
| 29          | ECK120010806   | 29        | j23119   | 84     | apFAB130 |
| 30          | ECK120030221   | 30        | apFAB50  | 85     | apFAB98  |
| 31          | ECK120010825   | 31        | apFAB85  | 86     | apFAB312 |
| 32          | ECK120015457-R | 32        | apFAB53  | 87     | apFAB129 |
| 33          | ECK120010840   | 33        | apFAB318 | 88     | apFAB311 |
| 34          | ECK120010781   | 34        | apFAB44  | 89     | j23107   |
| 35          | ECK120010864   | 35        | apFAB76  | 90     | j23105   |
| 36          | ECK120010793   | 36        | apFAB65  | 91     | apFAB277 |
| 37          | ECK120010856   | 37        | apFAB140 | 92     | apFAB300 |
| 38          | ECK120010867   | 38        | apFAB66  | 93     | j23110   |
| 39          | ECK120010815   | 39        | apFAB75  | 94     | j23116   |
| 40          | ECK120010863   | 40        | apFAB345 | 95     | j23114   |
| 41          | ECK120010782   | 41        | apFAB103 | 96     | j23108   |
| 42          | ECK120016882   | 42        | apFAB347 | 97     | apFAB259 |
| 43          | ECK120023928   | 43        | apFAB39  | 98     | j23115   |
| 44          | tonB/P14       | 44        | apFAB94  | 99     | j23109   |
| 45          | ECK120035133   | 45        | apFAB323 | 100    | apFAB139 |
| 46          | ECK120010855   | 46        | apFAB97  | 101    | j23113   |
| 47          | ECK120017009   | 47        | apFAB78  | 102    | j23112   |
| 48          | ECK120015170   | 48        | apFAB57  | 103    | apFAB134 |
| 49          | ECK120026481-R | 49        | apFAB72  | 104    | j23103   |
| 50          | BBa_B0062      | 50        | apFAB62  | 105    | apFAB114 |
| 51          | ECK120010858-R | 51        | apFAB48  | 106    | j23117   |
| 52          | ECK120034435   | 52        | apFAB55  | 107    | apFAB109 |
|             |                | 53        | j23100   | 108    | apFAB149 |
|             |                | 54        | apFAB77  | 109    | apFAB124 |
|             |                | 55        | j23104   |        |          |

**Appendix Table S5: Promoter and Terminator ordering for Figure EV4**
